# Supplementary material
Source: MDPI journal article supplement (https://www.mdpi.com/2073-4395/12/3/658)
Supplement: s1 [file s1]

**Table S1.** Correlation values (r) resulted from the principal component analysis (PCA) between earthworm density (EW.D), earthworm biomass weight (EW.W), and physio-biochemical soil parameters under mid-term (10 years) CSA- based management practices. Where, BD- Bulk density, IR- Infiltration rate, MWD- Mean weight diameter, DHA- Dehydrogenase, ACP- Acid phosphatase, ALP- Alkaline phosphatase, SPR- Soil Penetration resistance, EC -Electrical conductivity, TOC -Total organic carbon, N- Nitrogen, P- Phosphorus, K- Potassium, and EWC- Earthworm.

|               | EW.D<br>0-15 cm | EW.W.<br>0-15 cm | EW-D.<br>15-30 cm | EW.W<br>15-30 cm | BD    | IR    | MWD   | DHA-<br>EWC | DHA-<br>Soil | ACP-<br>EWC | ACP-<br>Soil | ALP-<br>EWC | ALP-<br>Soil | SPR   | EC-<br>EWC | EC-<br>Soil | PH-<br>EWC | PH-<br>Soil | TOC-<br>EWC | TOC-<br>Soil | N-<br>EWC | N-<br>Soil | P-<br>EWC | P-<br>Soil | K-<br>EWC | K-<br>Soil |
|---------------|-----------------|------------------|-------------------|------------------|-------|-------|-------|-------------|--------------|-------------|--------------|-------------|--------------|-------|------------|-------------|------------|-------------|-------------|--------------|-----------|------------|-----------|------------|-----------|------------|
| EW.D 0-15 cm  | 1               | 0.95             | 0.89              | 0.86             | -0.72 | 0.68  | 0.94  | 0.82        | -0.18        | 0.84        | -0.32        | 0.78        | -0.74        | -0.15 | 0.43       | 0.49        | 0.77       | -0.84       | 0.87        | 0.84         | 0.84      | 0.82       | 0.74      | 0.95       | 0.8       | 0.96       |
| EW.W 0-15 cm  | 0.95            | 1                | 0.83              | 0.81             | -0.66 | 0.44  | 0.81  | 0.61        | -0.04        | 0.67        | -0.31        | 0.57        | -0.78        | 0.06  | 0.14       | 0.34        | 0.56       | -0.79       | 0.7         | 0.66         | 0.65      | 0.68       | 0.52      | 0.99       | 0.6       | 0.84       |
| EW.D 15-30 cm | 0.89            | 0.83             | 1                 | 0.99             | -0.67 | 0.77  | 0.94  | 0.75        | -0.57        | 0.91        | 0.12         | 0.85        | -0.83        | -0.14 | 0.53       | 0.18        | 0.85       | -0.55       | 0.92        | 0.69         | 0.86      | 0.62       | 0.81      | 0.83       | 0.86      | 0.81       |
| EW.W 15-30 cm | 0.86            | 0.81             | 0.99              | 1                | -0.57 | 0.76  | 0.93  | 0.73        | -0.58        | 0.9         | 0.2          | 0.83        | -0.88        | -0.21 | 0.52       | 0.07        | 0.83       | -0.54       | 0.9         | 0.66         | 0.83      | 0.62       | 0.8       | 0.82       | 0.84      | 0.76       |
| BD            | -0.72           | -0.66            | -0.67             | -0.57            | 1     | -0.45 | -0.65 | -0.54       | 0.33         | -0.57       | 0.37         | -0.6        | 0.22         | -0.37 | -0.29      | -0.67       | -0.59      | 0.36        | -0.66       | -0.54        | -0.64     | -0.35      | -0.48     | -0.59      | -0.66     | -0.75      |
| IR            | 0.68            | 0.44             | 0.77              | 0.76             | -0.45 | 1     | 0.88  | 0.94        | -0.62        | 0.96        | 0.09         | 0.98        | -0.51        | -0.62 | 0.95       | 0.36        | 0.98       | -0.52       | 0.94        | 0.86         | 0.96      | 0.76       | 1         | 0.47       | 0.97      | 0.77       |
| MWD           | 0.94            | 0.81             | 0.94              | 0.93             | -0.65 | 0.88  | 1     | 0.92        | -0.45        | 0.98        | -0.08        | 0.94        | -0.75        | -0.36 | 0.69       | 0.39        | 0.94       | -0.73       | 0.98        | 0.89         | 0.96      | 0.83       | 0.92      | 0.82       | 0.95      | 0.93       |
| DHA-EWC       | 0.82            | 0.61             | 0.75              | 0.73             | -0.54 | 0.94  | 0.92  | 1           | -0.35        | 0.94        | -0.22        | 0.95        | -0.52        | -0.58 | 0.85       | 0.57        | 0.95       | -0.75       | 0.94        | 0.98         | 0.97      | 0.91       | 0.96      | 0.62       | 0.95      | 0.91       |
| DHA-Soil      | -0.18           | -0.04            | -0.57             | -0.58            | 0.33  | -0.62 | -0.45 | -0.35       | 1            | -0.58       | -0.68        | -0.62       | 0.3          | 0.12  | -0.62      | 0.19        | -0.62      | -0.27       | -0.57       | -0.17        | -0.52     | 0.01       | -0.58     | -0.03      | -0.61     | -0.18      |
| ACP-EWC       | 0.84            | 0.67             | 0.91              | 0.9              | -0.57 | 0.96  | 0.98  | 0.94        | -0.58        | 1           | 0.05         | 0.99        | -0.69        | -0.47 | 0.82       | 0.34        | 0.98       | -0.62       | 0.99        | 0.88         | 0.98      | 0.79       | 0.98      | 0.68       | 0.98      | 0.86       |
| ACP-Soil      | -0.32           | -0.31            | 0.12              | 0.2              | 0.37  | 0.09  | -0.08 | -0.22       | -0.68        | 0.05        | 1            | 0.03        | -0.26        | -0.14 | 0.12       | -0.84       | 0.03       | 0.57        | -0.01       | -0.4         | -0.1      | -0.41      | 0.05      | -0.27      | -0.02     | -0.44      |
| ALP-EWC       | 0.78            | 0.57             | 0.85              | 0.83             | -0.6  | 0.98  | 0.94  | 0.95        | -0.62        | 0.99        | 0.03         | 1           | -0.56        | -0.48 | 0.88       | 0.41        | 1          | -0.55       | 0.98        | 0.88         | 0.99      | 0.76       | 0.99      | 0.58       | 1         | 0.84       |
| ALP-Soil      | -0.74           | -0.78            | -0.83             | -0.88            | 0.22  | -0.51 | -0.75 | -0.52       | 0.3          | -0.69       | -0.26        | -0.56       | 1            | 0.28  | -0.25      | 0.22        | -0.56      | 0.58        | -0.66       | -0.48        | -0.57     | -0.57      | -0.58     | -0.83      | -0.55     | -0.56      |
| SPR           | -0.15           | 0.06             | -0.14             | -0.21            | -0.37 | -0.62 | -0.36 | -0.58       | 0.12         | -0.47       | -0.14        | -0.48       | 0.28         | 1     | -0.71      | 0           | -0.48      | 0.4         | -0.38       | -0.54        | -0.45     | -0.62      | -0.6      | -0.03      | -0.42     | -0.25      |
| EC-EWC        | 0.43            | 0.14             | 0.53              | 0.52             | -0.29 | 0.95  | 0.69  | 0.85        | -0.62        | 0.82        | 0.12         | 0.88        | -0.25        | -0.71 | 1          | 0.35        | 0.89       | -0.33       | 0.79        | 0.76         | 0.84      | 0.63       | 0.91      | 0.17       | 0.86      | 0.58       |
| EC-Soil       | 0.49            | 0.34             | 0.18              | 0.07             | -0.67 | 0.36  | 0.39  | 0.57        | 0.19         | 0.34        | -0.84        | 0.41        | 0.22         | 0     | 0.35       | 1           | 0.41       | -0.54       | 0.41        | 0.66         | 0.5       | 0.54       | 0.37      | 0.29       | 0.46      | 0.68       |
| PH-EWC        | 0.77            | 0.56             | 0.85              | 0.83             | -0.59 | 0.98  | 0.94  | 0.95        | -0.62        | 0.98        | 0.03         | 1           | -0.56        | -0.48 | 0.89       | 0.41        | 1          | -0.55       | 0.98        | 0.88         | 0.99      | 0.76       | 0.99      | 0.57       | 1         | 0.84       |
| PH-Soil       | -0.84           | -0.79            | -0.55             | -0.54            | 0.36  | -0.52 | -0.73 | -0.75       | -0.27        | -0.62       | 0.57         | -0.55       | 0.58         | 0.4   | -0.33      | -0.54       | -0.55      | 1           | -0.62       | -0.85        | -0.65     | -0.94      | -0.58     | -0.82      | -0.56     | -0.85      |
| TOC-EWC       | 0.87            | 0.7              | 0.92              | 0.9              | -0.66 | 0.94  | 0.98  | 0.94        | -0.57        | 0.99        | -0.01        | 0.98        | -0.66        | -0.38 | 0.79       | 0.41        | 0.98       | -0.62       | 1           | 0.88         | 0.99      | 0.78       | 0.96      | 0.71       | 0.99      | 0.9        |
| TOC-Soil      | 0.84            | 0.66             | 0.69              | 0.66             | -0.54 | 0.86  | 0.89  | 0.98        | -0.17        | 0.88        | -0.4         | 0.88        | -0.48        | -0.54 | 0.76       | 0.66        | 0.88       | -0.85       | 0.88        | 1            | 0.93      | 0.96       | 0.89      | 0.67       | 0.88      | 0.94       |
| N-EWC         | 0.84            | 0.65             | 0.86              | 0.83             | -0.64 | 0.96  | 0.96  | 0.97        | -0.52        | 0.98        | -0.1         | 0.99        | -0.57        | -0.45 | 0.84       | 0.5         | 0.99       | -0.65       | 0.99        | 0.93         | 1         | 0.82       | 0.98      | 0.65       | 0.99      | 0.91       |
| N-Soil        | 0.82            | 0.68             | 0.62              | 0.62             | -0.35 | 0.76  | 0.83  | 0.91        | 0.01         | 0.79        | -0.41        | 0.76        | -0.57        | -0.62 | 0.63       | 0.54        | 0.76       | -0.94       | 0.78        | 0.96         | 0.82      | 1          | 0.8       | 0.72       | 0.75      | 0.88       |
| P-EWC         | 0.74            | 0.52             | 0.81              | 0.8              | -0.48 | 1     | 0.92  | 0.96        | -0.58        | 0.98        | 0.05         | 0.99        | -0.58        | -0.6  | 0.91       | 0.37        | 0.99       | -0.58       | 0.96        | 0.89         | 0.98      | 0.8        | 1         | 0.55       | 0.98      | 0.81       |
| P-Soil        | 0.95            | 0.99             | 0.83              | 0.82             | -0.59 | 0.47  | 0.82  | 0.62        | -0.03        | 0.68        | -0.27        | 0.58        | -0.83        | -0.03 | 0.17       | 0.29        | 0.57       | -0.82       | 0.71        | 0.67         | 0.65      | 0.72       | 0.55      | 1          | 0.6       | 0.83       |
| K-EWC         | 0.8             | 0.6              | 0.86              | 0.84             | -0.66 | 0.97  | 0.95  | 0.95        | -0.61        | 0.98        | -0.02        | 1           | -0.55        | -0.42 | 0.86       | 0.46        | 1          | -0.56       | 0.99        | 0.88         | 0.99      | 0.75       | 0.98      | 0.6        | 1         | 0.87       |
| K-Soil        | 0.96            | 0.84             | 0.81              | 0.76             | -0.75 | 0.77  | 0.93  | 0.91        | -0.18        | 0.86        | -0.44        | 0.84        | -0.56        | -0.25 | 0.58       | 0.68        | 0.84       | -0.85       | 0.9         | 0.94         | 0.91      | 0.88       | 0.81      | 0.83       | 0.87      | 1          |
